# Supplementary material
Source: MDPI journal article supplement (https://www.mdpi.com/1424-2818/13/10/491)
Supplement: s1 [file s1]

**Supplementary Material S1.** *OpenBUGS* software code used to fit an auto-logistic parameterization<sup>1</sup> of the dynamic (multi-season) occupancy model through Bayesian inference to study habitat and urbanization covariates of juvenile blue crab *Callinectes sapidus* occupancy dynamics in eight North Carolina (USA) tidal creeks. The full model (all covariates) is presented here. Effects not considered in the final model run are commented out with a single pound sign (#). Comments for the modeler are denoted by multiple pound signs.

```
model {

  psi ~ dunif(0,1)      ### initial occupancy probability

  ### Prior distributions for occupancy model auto-logistic parameters

  for(t in 1:(n.seasons-1)){
    a[t] ~ dnorm(0,0.01)
    b[t] ~ dnorm(0,0.01)
  }

  ### Prior distributions for ecological model parameters: effects on colonization

  #  alpha1 ~ dnorm(0,0.01)  ### depth
    alpha2 ~ dnorm(0,0.01)  ### imperviousness
  #  alpha3 ~ dnorm(0,0.01)  ### marsh percent
  #  alpha4 ~ dnorm(0,0.01)  ### edge percent
    alpha5 ~ dnorm(0,0.01)  ### salinity

  #  culud[1] <- 0      ### culvert location
  #  culud[2] ~ dnorm(0,0.01)

  ### Prior distributions for ecological model parameters: partial effects on survival

  #  alpha1S ~ dnorm(0,0.01)  ### depth
    alpha2S ~ dnorm(0,0.01)  ### imperviousness
  #  alpha3S ~ dnorm(0,0.01)  ### marsh percent
  #  alpha4S ~ dnorm(0,0.01)  ### edge percent
    alpha5S ~ dnorm(0,0.01)  ### salinity

  ### Prior distributions for observation model parameters

    beta0 ~ dnorm(0,0.01)    ### intercept
    beta1 ~ dnorm(0,0.01)    ### water temperature
  #  beta2 ~ dnorm(0,0.01)    ### salinity
  #  beta3 ~ dnorm(0,0.01)    ### dissolved oxygen

  ##### Ecological model fitted to standardized values for covariates

  for(i in 1:n.sites){
    z[i,1] ~ dbern(psi)
    for(t in 2:n.seasons){
```

```

        logit(muZ[i,t]) <-
        a[t-1] + b[t-1]*z[i,t-1]
#      + alpha1 * ((depth[i] - MeanDepth)/StDevDepth)
#      + alpha2 * ((imperv[i] - MeanImperv)/StDevImperv)
#      + alpha3 * ((marshpercent[i] - MeanMarshPercent)/StDevMarshPercent)
#      + alpha4 * ((edgepercent[i] - MeanEdgePercent)/StDevEdgePercent)
#      + alpha5 * ((OccSalt[i] - MeanOccSalt)/StDevOccSalt)
#      + culud[culvertupdown[i]]

#      + alpha1S * ((depth[i] - MeanDepth)/StDevDepth) * z[i,t-1]
#      + alpha2S * ((imperv[i] - MeanImperv)/StDevImperv) * z[i,t-1]
#      + alpha3S * ((marshpercent[i] - MeanMarshPercent)/StDevMarshPercent) * z[i,t-1]
#      + alpha4S * ((edgepercent[i] - MeanEdgePercent)/StDevEdgePercent) * z[i,t-1]
#      + alpha5S * ((OccSalt[i] - MeanOccSalt)/StDevOccSalt) * z[i,t-1]

        Impute_Occ_Salt[i] ~ dunif(min_Occ_Salt, max_Occ_Salt) # impute missing values

        z[i,t] ~ dbern(muZ[i,t])    ### state model

    } #t
  } #i

### Calculated values for colonization and survival for covariates in final ecological model

colImperv <- alpha2    ### colonization imperviousness
colSalt <- alpha5      ### colonization salinity
survImperv <- alpha2 + alpha2S    ### survival imperviousness
survSalt <- alpha5 + alpha5S      ### survival salinity

##### Observation model fitted to standardized values for covariates

for(i in 1:n.sites) {
  for(j in 1:n.reps) {
    for(t in 1:n.seasons){
      Temp[i,j,t] ~ dunif(min_Temp, max_Temp)    ### impute missing current values
#      Salt[i,j,t] ~ dunif(min_Salt, max_Salt)      ### impute missing current values
#      DO[i,j,t] ~ dunif(min_DO, max_DO)          ### impute missing current values

      logit.p[i,j,t] <- beta0
      + beta1 * ((Temp[i,j,t] - mean_Temp)/sd_Temp)
#      + beta2 * ((Salt[i,j,t] - mean_Salt)/sd_Salt)
#      + beta3 * ((DO[i,j,t] - mean_DO)/sd_DO)

      muY[i,j,t] <- z[i,t] * p[i,j,t]    ### observation model
      y[i,j,t] ~ dbern(muY[i,j,t])
    } #j
  } #i
} #t

##### Calculated values

for(t in 1:9){    ### each interval between seasons

```

```

    intcol[t] <- a[t]          ### rename colonization intercept by season
    intsurv[t] <- a[t] + b[t]  ### survival intercept by season
  }

###compute average intercepts for intervals between celestial seasons

intColSummerFall <- (intcol[1] + intcol[5] + intcol[9])/3      ### colonization
intSurvSummerFall <- (intsurv[1] + intsurv[5] + intsurv[9])/3  ### survival

intColFallWinter <- (intcol[2] + intcol[6])/2                ### colonization
intSurvFallWinter <- (intsurv[2]+intsurv[6])/2              ### survival

intColWinterSpring <- (intcol[3] + intcol[7])/2              ### colonization
intSurvWinterSpring <- (intsurv[3]+intsurv[7])/2            ### survival

intColSpringSummer <- (intcol[4] + intcol[8])/2              ### colonization
intSurvSpringSummer <- (intsurv[4]+intsurv[8])/2            ### survival

##### Calculations of colonization and survival by season
##### Calculate across range of values of each covariate retained in the ecological model
##### Transformed and back-calculated values

### imperviousness

for(i in 1:SampleSizePredictedImperv){
  for(t in 1:9){      ### each interval between seasons
    transColImp[i,t] <- intcol[t] + alpha2 * ((PredictedImperv[i] -
      MeanPredictedImperv)/StDevPredictedImperv)
    backtransColImp[i,t] <- (exp(transColImp[i,t]))/(1+ exp(transColImp[i,t]))
    transSurvImp[i,t] <- intsurv[t] + survImp * ((PredictedImperv[i] -
      MeanPredictedImperv)/StDevPredictedImperv)
    backtransSurvImp[i,t] <- (exp(transSurvImp[i,t]))/(1+ exp(transSurvImp[i,t]))
  }}

### salinity

for(i in 1:SampleSizePredictedSalt){
  for(t in 1:9){      ### each interval between seasons
    transColSalt[i,t] <- intcol[t] + alpha5 * ((PredictedSalt[i] -
      MeanPredictedSalt)/StDevPredictedSalt)
    backtransColSalt[i,t] <- (exp(transColSalt[i,t]))/(1+ exp(transColSalt[i,t]))
    transSurvSalt[i,t] <- intsurv[t] + survSalt * ((PredictedSalt[i] -
      MeanPredictedSalt)/StDevPredictedSalt)
    backtransSurvSalt[i,t] <- (exp(transSurvSalt[i,t]))/(1+ exp(transSurvSalt[i,t]))
  }}

##### Transformed and back-calculated values for detection probability
##### Calculate across the range of values of the covariate retained in the observation model

for(i in 1:SampleSizePredictedWaterTemp){
  transDetProb[i] <- beta0 + beta1 * SampleStandardizedPredictedWaterTemp[i]
  backtransDetProb[i] <- (exp(transDetProb[i]))/(1+ exp(transDetProb[i]))
}

```

```
}  
  
} ### end model
```

<sup>1</sup> Royle, J.A.; Dorazio, R.M. *Hierarchical modeling and inference in ecology: the analysis of data from populations, metapopulations and communities*. Academic Press, Oxford. 2008.
